# Supplementary material
Source: MDPI journal article supplement (https://www.mdpi.com/2073-4344/11/8/920)
Supplement: s1 [file s1]

**Table S1.** The calculated values of the final 12 descriptors for each complex.

| <b>Complexes</b> | <b>No.1</b>    | <b>No.2[e]</b> | <b>No.3[e]</b> | <b>No.4[kcal/mol]</b> | <b>No.5</b>  | <b>No.6</b>  |
|------------------|----------------|----------------|----------------|-----------------------|--------------|--------------|
| <b>1</b>         | 4.15           | -0.0276        | -21.99         | 3.18                  | 0.0215       | 0.0014       |
| <b>2</b>         | 4.14           | -0.0316        | -22.09         | 3.17                  | 0.0219       | 0.0017       |
| <b>3</b>         | 4.12           | -0.0309        | -22.08         | 3.17                  | 0.0219       | 0.0009       |
| <b>4</b>         | 4.13           | -0.0289        | -23.61         | 3.16                  | 0.0212       | 0.0016       |
| <b>5</b>         | 4.33           | -0.0316        | -23.25         | 3.17                  | 0.0215       | 0.0019       |
| <b>8</b>         | 4.08           | -0.0309        | -19.65         | 3.43                  | 0.0221       | 0.0018       |
| <b>11</b>        | 3.68           | -0.0285        | -20.56         | 3.20                  | 0.0215       | 0.0006       |
| <b>12</b>        | 3.81           | -0.0280        | -19.11         | 3.24                  | 0.0215       | 0.0005       |
| <b>14</b>        | 3.68           | -0.0285        | -20.03         | 3.41                  | 0.0214       | 0.0020       |
| <b>15</b>        | 3.81           | -0.0280        | -19.12         | 3.45                  | 0.0214       | 0.0060       |
| <b>16</b>        | 4.20           | -0.0288        | -21.12         | 3.28                  | 0.0210       | 0.0037       |
| <b>17</b>        | 4.13           | -0.0270        | -23.48         | 3.17                  | 0.0198       | 0.0012       |
| <b>20</b>        | 4.09           | -0.0289        | -25.25         | 3.05                  | 0.0207       | 0.0014       |
| <b>21</b>        | 4.30           | -0.0316        | -24.20         | 3.13                  | 0.0196       | 0.0025       |
| <b>22</b>        | 4.05           | -0.0270        | -20.70         | 3.35                  | 0.0206       | 0.0028       |
| <b>23</b>        | 4.07           | -0.0316        | -19.66         | 3.37                  | 0.0206       | 0.0035       |
| <b>24</b>        | 4.07           | -0.0309        | -18.58         | 3.40                  | 0.0211       | 0.0026       |
| <b>25</b>        | 4.13           | -0.0289        | -21.95         | 3.25                  | 0.0202       | 0.0024       |
| <b>26</b>        | 4.33           | -0.0316        | -21.09         | 3.29                  | 0.0203       | 0.0091       |
| <b>27</b>        | 3.71           | -0.0285        | -19.89         | 3.16                  | 0.0215       | 0.0007       |
| <b>28</b>        | 3.85           | -0.0280        | -23.15         | 3.12                  | 0.0210       | 0.0004       |
| <b>29</b>        | 4.25           | -0.0288        | -22.92         | 3.13                  | 0.0210       | 0.0013       |
| <b>30</b>        | 4.25           | -0.0288        | -21.51         | 3.24                  | 0.0210       | 0.0018       |
| <b>31</b>        | 4.09           | -0.0289        | -23.20         | 3.10                  | 0.0209       | 0.0013       |
| <b>32</b>        | 4.09           | -0.0289        | -21.81         | 3.22                  | 0.0210       | 0.0027       |
| <b>33</b>        | 4.45           | -0.0331        | -25.15         | 3.14                  | 0.0159       | 0.0010       |
| <b>34</b>        | 4.30           | -0.0331        | -26.59         | 3.11                  | 0.0160       | 0.0021       |
| <b>35</b>        | 4.25           | -0.0331        | -22.02         | 3.21                  | 0.0158       | 0.0012       |
| <b>36</b>        | 4.45           | -0.0331        | -25.74         | 3.04                  | 0.0160       | 0.0020       |
| <b>37</b>        | 4.49           | -0.0331        | -27.62         | 2.99                  | 0.0160       | 0.0020       |
| <b>38</b>        | 4.45           | -0.0331        | -26.92         | 2.95                  | 0.0156       | 0.0012       |
| <b>39</b>        | 4.30           | -0.0331        | -28.15         | 2.94                  | 0.0156       | 0.0011       |
| <b>40</b>        | 4.25           | -0.0331        | -23.74         | 2.96                  | 0.0155       | 0.0007       |
| <b>41</b>        | 4.45           | -0.0331        | -27.38         | 2.92                  | 0.0156       | 0.0011       |
| <b>42</b>        | 4.49           | -0.0331        | -29.33         | 2.89                  | 0.0157       | 0.0010       |
| <b>43</b>        | 4.09           | -0.0280        | -23.20         | 3.09                  | 0.0180       | 0.0012       |
| <b>44</b>        | 3.88           | -0.0316        | -22.80         | 3.12                  | 0.0182       | 0.0008       |
| <b>45</b>        | 4.07           | -0.0289        | -24.29         | 3.07                  | 0.0178       | 0.0009       |
| <b>46</b>        | 4.10           | -0.0316        | -25.88         | 3.04                  | 0.0177       | 0.0008       |
| <b>Complexes</b> | <b>No.7[e]</b> | <b>No.8</b>    | <b>No.9[e]</b> | <b>No.10</b>          | <b>No.11</b> | <b>No.12</b> |
| <b>1</b>         | -2.61          | -52.04         | 0.0023         | 0.9948                | 3.20         | 0.9251       |

|    |       |        |        |        |      |        |
|----|-------|--------|--------|--------|------|--------|
| 2  | -2.50 | -51.85 | 0.0022 | 0.9959 | 3.20 | 0.9254 |
| 3  | -2.69 | -57.55 | 0.0017 | 0.9954 | 3.19 | 0.9258 |
| 4  | -2.58 | -56.40 | 0.0021 | 0.9948 | 3.20 | 0.9250 |
| 5  | -2.49 | -55.92 | 0.0020 | 0.9960 | 3.20 | 0.9255 |
| 8  | -2.48 | -53.47 | 0.0012 | 0.9954 | 3.20 | 0.9240 |
| 11 | -2.36 | -48.13 | 0.0021 | 0.9934 | 3.19 | 0.9234 |
| 12 | -2.41 | -46.77 | 0.0017 | 0.9937 | 3.19 | 0.9227 |
| 14 | -2.29 | -50.22 | 0.0020 | 0.9934 | 3.20 | 0.9231 |
| 15 | -2.41 | -51.67 | 0.0024 | 0.9937 | 3.19 | 0.9224 |
| 16 | -2.33 | -53.37 | 0.0020 | 0.9947 | 3.20 | 0.9233 |
| 17 | -2.29 | -53.33 | 0.0024 | 0.9948 | 3.20 | 0.9231 |
| 20 | -2.28 | -56.91 | 0.0023 | 0.9948 | 3.20 | 0.9225 |
| 21 | -2.14 | -55.14 | 0.0014 | 0.9958 | 3.20 | 0.9232 |
| 22 | -2.89 | -63.49 | 0.0023 | 0.9948 | 3.19 | 0.9239 |
| 23 | -2.83 | -60.78 | 0.0010 | 0.9960 | 3.19 | 0.9242 |
| 24 | -2.91 | -63.48 | 0.0017 | 0.9955 | 3.19 | 0.9243 |
| 25 | -2.82 | -65.56 | 0.0021 | 0.9949 | 3.19 | 0.9239 |
| 26 | -2.74 | -64.18 | 0.0010 | 0.9960 | 3.19 | 0.9242 |
| 27 | -2.34 | -46.47 | 0.0017 | 0.9927 | 3.20 | 0.9244 |
| 28 | -2.50 | -52.68 | 0.0010 | 0.9933 | 3.20 | 0.9247 |
| 29 | -2.40 | -54.17 | 0.0020 | 0.9951 | 3.20 | 0.9239 |
| 30 | -2.34 | -55.25 | 0.0021 | 0.9948 | 3.20 | 0.9236 |
| 31 | -2.47 | -55.97 | 0.0021 | 0.9949 | 3.20 | 0.9241 |
| 32 | -2.39 | -55.51 | 0.0025 | 0.9949 | 3.20 | 0.9238 |
| 33 | -3.05 | -72.25 | 0.0018 | 0.9957 | 3.21 | 0.9248 |
| 34 | -3.07 | -74.31 | 0.0000 | 0.9958 | 3.20 | 0.9249 |
| 35 | -3.07 | -69.15 | 0.0010 | 0.9957 | 3.20 | 0.9259 |
| 36 | -2.94 | -73.00 | 0.0017 | 0.9957 | 3.21 | 0.9249 |
| 37 | -2.98 | -76.94 | 0.0005 | 0.9958 | 3.20 | 0.9248 |
| 38 | -3.12 | -71.95 | 0.0015 | 0.9957 | 3.21 | 0.9259 |
| 39 | -3.10 | -72.73 | 0.0000 | 0.9958 | 3.21 | 0.9257 |
| 40 | -3.11 | -68.03 | 0.0007 | 0.9957 | 3.20 | 0.9264 |
| 41 | -3.01 | -74.17 | 0.0013 | 0.9957 | 3.21 | 0.9258 |
| 42 | -3.00 | -76.30 | 0.0005 | 0.9958 | 3.21 | 0.9257 |
| 43 | -2.70 | -57.04 | 0.0023 | 0.9947 | 3.21 | 0.9272 |
| 44 | -2.58 | -54.39 | 0.0018 | 0.9958 | 3.20 | 0.9264 |
| 45 | -2.65 | -59.42 | 0.0019 | 0.9948 | 3.21 | 0.9274 |
| 46 | -2.71 | -62.65 | 0.0006 | 0.9958 | 3.21 | 0.9261 |

**Table S2.** The modeling results of the different combinations of training and test sets including  $R^2$ ,  $Q^2$ ,  $R_t^2$ ,  $RMSEF$  and  $RMSEV$  values for 39 complexes.

| Entry | Training | Test | $R^2$  | $RMSEF$ | $Q^2$  | $RMSEV$ | $R_t^2$ |
|-------|----------|------|--------|---------|--------|---------|---------|
| 1     | 32       | 7    | 0.8846 | 0.3444  | 0.5391 | 0.6682  | 0.8175  |

|   |    |    |        |        |        |        |        |
|---|----|----|--------|--------|--------|--------|--------|
| 2 | 31 | 8  | 0.8961 | 0.3260 | 0.7036 | 0.5356 | 0.7640 |
| 3 | 30 | 9  | 0.8916 | 0.3299 | 0.6518 | 0.5802 | 0.8137 |
| 4 | 29 | 10 | 0.8917 | 0.3354 | 0.6974 | 0.5405 | 0.8135 |
| 5 | 28 | 11 | 0.8984 | 0.3271 | 0.7533 | 0.4878 | 0.7941 |
| 6 | 27 | 12 | 0.8969 | 0.3266 | 0.7482 | 0.4924 | 0.8064 |

**Table S3.** The values of experimental and predicted catalytic activities for the training set of 29 complexes and test set of 10 complexes from 2D-QSAR analysis.

| Complexes | Exp. Activity<br>( $10^6 \text{ g}\cdot\text{mol}^{-1}\cdot\text{h}^{-1}$ ) | 2D-Pred.<br>( $10^6 \text{ g}\cdot\text{mol}^{-1}\cdot\text{h}^{-1}$ ) | Sets     |
|-----------|-----------------------------------------------------------------------------|------------------------------------------------------------------------|----------|
| 1         | 3.44                                                                        | 3.88                                                                   | Training |
| 2         | 1.13                                                                        | 1.96                                                                   | Training |
| 3         | 0.60                                                                        | 0.96                                                                   | Training |
| 4         | 2.18                                                                        | 2.59                                                                   | Test     |
| 5         | 1.00                                                                        | 1.47                                                                   | Training |
| 6         | 7.18                                                                        | -                                                                      | Outlier  |
| 7         | 6.22                                                                        | -                                                                      | Outlier  |
| 8         | 4.71                                                                        | 4.06                                                                   | Training |
| 9         | 6.85                                                                        | -                                                                      | Outlier  |
| 10        | 5.65                                                                        | -                                                                      | Outlier  |
| 11        | 3.08                                                                        | 2.61                                                                   | Training |
| 12        | 4.97                                                                        | 4.30                                                                   | Training |
| 13        | 6.27                                                                        | -                                                                      | Outlier  |
| 14        | 3.47                                                                        | 4.02                                                                   | Training |
| 15        | 4.76                                                                        | 4.64                                                                   | Training |
| 16        | 4.17                                                                        | 4.78                                                                   | Training |
| 17        | 3.7                                                                         | 4.08                                                                   | Training |
| 18        | 7.1                                                                         | -                                                                      | Outlier  |
| 19        | 8.7                                                                         | -                                                                      | Outlier  |
| 20        | 2.4                                                                         | 2.34                                                                   | Training |
| 21        | 2.5                                                                         | 2.55                                                                   | Training |
| 22        | 3.1                                                                         | 3.85                                                                   | Training |
| 23        | 3.4                                                                         | 3.11                                                                   | Test     |
| 24        | 4.1                                                                         | 3.17                                                                   | Training |
| 25        | 2.5                                                                         | 2.42                                                                   | Test     |
| 26        | 4.0                                                                         | 3.62                                                                   | Training |
| 27        | 4.85                                                                        | 4.01                                                                   | Training |
| 28        | 2.40                                                                        | 3.30                                                                   | Training |
| 29        | 4.03                                                                        | 3.47                                                                   | Test     |
| 30        | 3.39                                                                        | 3.87                                                                   | Training |
| 31        | 4.10                                                                        | 2.96                                                                   | Test     |
| 32        | 2.98                                                                        | 3.33                                                                   | Test     |
| 33        | 0.3                                                                         | 0.55                                                                   | Test     |
| 34        | 0.29                                                                        | 0.65                                                                   | Training |

|    |      |       |          |
|----|------|-------|----------|
| 35 | 0.23 | 1.07  | Training |
| 36 | 0.34 | 0.53  | Training |
| 37 | 0.31 | -0.05 | Training |
| 38 | 0.48 | -0.07 | Training |
| 39 | 0.35 | 0.63  | Test     |
| 40 | 0.32 | 0.69  | Training |
| 41 | 0.51 | -0.15 | Test     |
| 42 | 0.37 | -0.17 | Training |
| 43 | 3.08 | 3.13  | Training |
| 44 | 1.01 | 1.04  | Training |
| 45 | 3.51 | 2.40  | Test     |
| 46 | 1.45 | 1.93  | Training |

**Table S4.** The values of experimental and predicted catalytic activity for the training and test sets from 3D-QSPR analysis.

| Complexes | Exp. Activity<br>( $10^6 \text{ g}\cdot\text{mol}^{-1}\cdot\text{h}^{-1}$ ) | 3D-Pred.<br>( $10^6 \text{ g}\cdot\text{mol}^{-1}\cdot\text{h}^{-1}$ ) | Sets     |
|-----------|-----------------------------------------------------------------------------|------------------------------------------------------------------------|----------|
| 1         | 3.44                                                                        | 2.201                                                                  | Training |
| 2         | 1.13                                                                        | 1.010                                                                  | Training |
| 3         | 0.60                                                                        | 1.006                                                                  | Training |
| 4         | 2.18                                                                        | 2.142                                                                  | Test     |
| 5         | 1.00                                                                        | 0.872                                                                  | Training |
| 6         | 7.18                                                                        | -                                                                      | Outlier  |
| 7         | 6.22                                                                        | -                                                                      | Outlier  |
| 8         | 4.71                                                                        | 3.548                                                                  | Training |
| 9         | 6.85                                                                        | -                                                                      | Outlier  |
| 10        | 5.65                                                                        | -                                                                      | Outlier  |
| 11        | 3.08                                                                        | 3.972                                                                  | Training |
| 12        | 4.97                                                                        | 3.870                                                                  | Training |
| 13        | 6.27                                                                        | -                                                                      | Outlier  |
| 14        | 3.47                                                                        | 3.943                                                                  | Training |
| 15        | 4.76                                                                        | 4.058                                                                  | Training |
| 16        | 4.17                                                                        | 4.422                                                                  | Training |
| 17        | 3.7                                                                         | 3.353                                                                  | Training |
| 18        | 7.1                                                                         | -                                                                      | Outlier  |
| 19        | 8.7                                                                         | -                                                                      | Outlier  |
| 20        | 2.4                                                                         | 3.221                                                                  | Training |
| 21        | 2.5                                                                         | 3.048                                                                  | Training |
| 22        | 3.1                                                                         | 3.582                                                                  | Training |
| 23        | 3.4                                                                         | 3.470                                                                  | Test     |
| 24        | 4.1                                                                         | 3.179                                                                  | Training |
| 25        | 2.5                                                                         | 3.522                                                                  | Test     |
| 26        | 4.0                                                                         | 3.411                                                                  | Training |
| 27        | 4.85                                                                        | 3.860                                                                  | Training |

|    |      |       |          |
|----|------|-------|----------|
| 28 | 2.40 | 2.880 | Training |
| 29 | 4.03 | 4.184 | Test     |
| 30 | 3.39 | 4.057 | Training |
| 31 | 4.10 | 3.406 | Test     |
| 32 | 2.98 | 3.393 | Test     |
| 33 | 0.3  | 0.603 | Test     |
| 34 | 0.29 | 0.194 | Training |
| 35 | 0.23 | 0.160 | Training |
| 36 | 0.34 | 0.550 | Training |
| 37 | 0.31 | 0.120 | Training |
| 38 | 0.48 | 0.615 | Training |
| 39 | 0.35 | 0.253 | Test     |
| 40 | 0.32 | 0.128 | Training |
| 41 | 0.51 | 0.546 | Test     |
| 42 | 0.37 | 0.157 | Training |
| 43 | 3.08 | 2.893 | Training |
| 44 | 1.01 | 2.414 | Training |
| 45 | 3.51 | 2.823 | Test     |
| 46 | 1.45 | 2.443 | Training |

**Table S5.** The values of experimental and predicted molecular weight for the training and test sets from 3D-QSPR analysis.

| Complexes | Exp. Molecular weight<br>(g·mol <sup>-1</sup> ) | 3D-Pred.<br>(g·mol <sup>-1</sup> ) | Sets     |
|-----------|-------------------------------------------------|------------------------------------|----------|
| 1         | 2700                                            | 2735.6                             | Training |
| 2         | 4900                                            | 4999.7                             | Training |
| 3         | 3600                                            | 4366.4                             | Training |
| 4         | 3800                                            | 2992.9                             | Training |
| 5         | 5100                                            | 5262.7                             | Training |
| 6         | 2453                                            | -                                  | Outlier  |
| 7         | 3481                                            | -                                  | Outlier  |
| 8         | 4180                                            | 2752.5                             | Test     |
| 9         | 2825                                            | -                                  | Outlier  |
| 10        | 3830                                            | -                                  | Outlier  |
| 11        | 2360                                            | 2681.6                             | Training |
| 12        | 3640                                            | 3395.1                             | Training |
| 13        | 1910                                            | -                                  | Outlier  |
| 14        | 2320                                            | 2528.6                             | Training |
| 15        | 3210                                            | 2809.4                             | Test     |
| 16        | 1830                                            | 2869.2                             | Training |
| 17        | 59                                              | 382.3                              | Training |
| 18        | 60                                              | -                                  | Outlier  |
| 19        | 59                                              | -                                  | Outlier  |
| 20        | 62                                              | 721.1                              | Training |

|    |      |        |          |
|----|------|--------|----------|
| 21 | 59   | 499.2  | Test     |
| 22 | 60   | 179.6  | Training |
| 23 | 60   | 26.9   | Training |
| 24 | 60   | 480.3  | Training |
| 25 | 62   | 359.1  | Training |
| 26 | 59   | 247.2  | Training |
| 27 | 1840 | 1687.3 | Training |
| 28 | 3210 | 2949.1 | Training |
| 29 | 1720 | 1904.1 | Test     |
| 30 | 2190 | 2055.5 | Training |
| 31 | 2240 | 1431.8 | Test     |
| 32 | 1980 | 1456   | Training |
| 33 | 84   | -155.4 | Training |
| 34 | 86   | -181.3 | Training |
| 35 | 82   | 122.6  | Test     |
| 36 | 82   | 102.5  | Training |
| 37 | 83   | 43.9   | Training |
| 38 | 86   | -179.6 | Training |
| 39 | 86   | -241.3 | Test     |
| 40 | 84   | 72.4   | Training |
| 41 | 86   | 92.7   | Training |
| 42 | 86   | 92.3   | Training |
| 43 | 670  | 843.1  | Test     |
| 44 | 750  | 728.7  | Training |
| 45 | 870  | 1053.5 | Training |
| 46 | 730  | 998.9  | Training |

**Table S6.** Experimental values of catalytic activities, molecular weights and melting temperature of products under the optimum reaction conditions.

| Complex | Co-catalyst          | P <sup>a</sup> | Ratio <sup>b</sup> | T <sup>c</sup> | Activity <sup>d</sup> | M <sub>w</sub> <sup>e</sup> |
|---------|----------------------|----------------|--------------------|----------------|-----------------------|-----------------------------|
| 1       | Et <sub>2</sub> AlCl | 10             | 600                | 20             | 3.44                  | 2700                        |
| 2       | Et <sub>2</sub> AlCl | 10             | 600                | 20             | 1.13                  | 4900                        |
| 3       | Et <sub>2</sub> AlCl | 10             | 600                | 20             | 0.60                  | 3600                        |
| 4       | Et <sub>2</sub> AlCl | 10             | 600                | 20             | 2.18                  | 3800                        |
| 5       | Et <sub>2</sub> AlCl | 10             | 600                | 20             | 1.00                  | 5100                        |
| 6       | EASC                 | 10             | 800                | 20             | 7.18                  | 2453                        |
| 7       | EASC                 | 10             | 800                | 20             | 6.22                  | 3481                        |
| 8       | EASC                 | 10             | 800                | 20             | 4.71                  | 4180                        |
| 9       | EASC                 | 10             | 800                | 20             | 6.85                  | 2825                        |
| 10      | EASC                 | 10             | 800                | 20             | 5.65                  | 3830                        |
| 11      | Et <sub>2</sub> AlCl | 10             | 400                | 30             | 3.08                  | 2360                        |
| 12      | Et <sub>2</sub> AlCl | 10             | 400                | 30             | 4.97                  | 3640                        |
| 13      | Et <sub>2</sub> AlCl | 10             | 400                | 30             | 6.27                  | 1910                        |

|    |                      |    |     |    |      |      |
|----|----------------------|----|-----|----|------|------|
| 14 | Et <sub>2</sub> AlCl | 10 | 400 | 30 | 3.47 | 2320 |
| 15 | Et <sub>2</sub> AlCl | 10 | 400 | 30 | 4.76 | 3210 |
| 16 | Et <sub>2</sub> AlCl | 10 | 400 | 30 | 4.17 | 1830 |
| 17 | EASC                 | 10 | 400 | 20 | 3.7  | 59   |
| 18 | EASC                 | 10 | 400 | 20 | 7.1  | 60   |
| 19 | EASC                 | 10 | 400 | 20 | 8.7  | 59   |
| 20 | EASC                 | 10 | 400 | 20 | 2.4  | 62   |
| 21 | EASC                 | 10 | 400 | 20 | 2.5  | 59   |
| 22 | EASC                 | 10 | 400 | 20 | 3.1  | 60   |
| 23 | EASC                 | 10 | 400 | 20 | 3.4  | 60   |
| 24 | EASC                 | 10 | 400 | 20 | 4.1  | 60   |
| 25 | EASC                 | 10 | 400 | 20 | 2.5  | 62   |
| 26 | EASC                 | 10 | 400 | 20 | 4.0  | 59   |
| 27 | Et <sub>2</sub> AlCl | 10 | 300 | 30 | 4.85 | 1840 |
| 28 | Et <sub>2</sub> AlCl | 10 | 300 | 30 | 2.40 | 3210 |
| 29 | Et <sub>2</sub> AlCl | 10 | 300 | 30 | 4.03 | 1720 |
| 30 | Et <sub>2</sub> AlCl | 10 | 300 | 30 | 3.39 | 2190 |
| 31 | Et <sub>2</sub> AlCl | 10 | 300 | 30 | 4.10 | 2240 |
| 32 | Et <sub>2</sub> AlCl | 10 | 300 | 30 | 2.98 | 1980 |
| 33 | DEAC                 | 10 | 250 | 30 | 0.30 | 84   |
| 34 | DEAC                 | 10 | 250 | 30 | 0.29 | 86   |
| 35 | DEAC                 | 10 | 250 | 30 | 0.23 | 82   |
| 36 | DEAC                 | 10 | 250 | 30 | 0.34 | 82   |
| 37 | DEAC                 | 10 | 250 | 30 | 0.31 | 83   |
| 38 | DEAC                 | 10 | 250 | 30 | 0.48 | 86   |
| 39 | DEAC                 | 10 | 250 | 30 | 0.35 | 86   |
| 40 | DEAC                 | 10 | 250 | 30 | 0.32 | 84   |
| 41 | DEAC                 | 10 | 250 | 30 | 0.51 | 86   |
| 42 | DEAC                 | 10 | 250 | 30 | 0.37 | 86   |
| 43 | Et <sub>2</sub> AlCl | 10 | 500 | 30 | 3.08 | 670  |
| 44 | Et <sub>2</sub> AlCl | 10 | 500 | 30 | 1.01 | 750  |
| 45 | Et <sub>2</sub> AlCl | 10 | 500 | 30 | 3.51 | 870  |
| 46 | Et <sub>2</sub> AlCl | 10 | 500 | 30 | 1.45 | 730  |

<sup>a</sup> atm of ethylene; <sup>b</sup> co-catalyst/catalyst; <sup>c</sup> reaction temperature (°C); <sup>d</sup> 10<sup>6</sup>g·mol<sup>-1</sup>·h<sup>-1</sup>; <sup>e</sup> Determined by gel permeation chromatography, g·mol<sup>-1</sup>.

**Table S7.** The calculated bond lengths and bond angles by DFT compared with experimental crystal structures for complex **8** along with the values of standard deviation ( $\delta$ ).

| Complex <b>8</b> |                  |       |
|------------------|------------------|-------|
| Bonds            | Bond lengths (Å) |       |
|                  | Exp.             | MM    |
| Ni(1)-N(1)       | 2.044            | 2.021 |
| Ni(1)-N(2)       | 2.012            | 2.011 |

|                           |             |           |
|---------------------------|-------------|-----------|
| Ni(1)-Cl(1)               | 2.202       | 2.240     |
| Ni(1)-Cl(2)               | 2.234       | 2.234     |
| Ni(2)-C(9)                | 1.293       | 1.291     |
| N(2)-C(10)                | 1.451       | 1.445     |
| N(1)-C(1)                 | 1.367       | 1.357     |
| N(1)-C(5)                 | 1.362       | 1.346     |
| $\delta$                  |             | 0.63      |
| <b>Bond Angles (deg.)</b> |             |           |
| <b>Angles</b>             | <b>Exp.</b> | <b>MM</b> |
| N(2)-Ni(1)-N(1)           | 81.6        | 82.389    |
| N(2)-Ni(1)-Cl(1)          | 106.7       | 104.352   |
| N(1)-Ni(1)-Cl(1)          | 137.8       | 124.026   |
| N(2)-Ni(1)-Cl(2)          | 110.2       | 111.536   |
| N(1)-Ni(1)-Cl(2)          | 96.68       | 97.478    |
| Cl(1)-Ni(1)-Cl(2)         | 117.2       | 128.010   |
| $\delta$                  |             | 4.32      |

**Table S8.** The values of different self-defined descriptors for each Ni complex.

| Complexes | $Q$ [e] | $\theta$ [°] | $\beta$ [°] | $\Delta E$ [kcal·mol <sup>-1</sup> ] | $\Delta \varepsilon_1$ [kcal·mol <sup>-1</sup> ] | $\Delta \varepsilon_2$ [kcal·mol <sup>-1</sup> ] |
|-----------|---------|--------------|-------------|--------------------------------------|--------------------------------------------------|--------------------------------------------------|
| 1         | 0.347   | 252.199      | 80.700      | 15.81                                | 89.23                                            | 117.7                                            |
| 2         | 0.341   | 245.356      | 80.708      | 14.87                                | 89.23                                            | 117.3                                            |
| 3         | 0.340   | 227.970      | 80.543      | 14.06                                | 85.53                                            | 117.4                                            |
| 4         | 0.352   | 252.153      | 80.779      | 15.75                                | 89.98                                            | 116.4                                            |
| 5         | 0.342   | 245.152      | 80.743      | 15.62                                | 89.92                                            | 116.7                                            |
| 6         | 0.399   | 254.171      | 81.251      | 15.37                                | 87.73                                            | 123.7                                            |
| 7         | 0.379   | 249.817      | 81.225      | 15.31                                | 88.16                                            | 124.3                                            |
| 8         | 0.396   | 236.082      | 81.350      | 14.50                                | 88.04                                            | 124.7                                            |
| 9         | 0.404   | 253.775      | 81.330      | 15.50                                | 87.54                                            | 120.9                                            |
| 10        | 0.406   | 251.373      | 81.333      | 15.12                                | 88.73                                            | 119.7                                            |
| 11        | 0.314   | 226.177      | 79.440      | 20.64                                | 96.26                                            | 113.1                                            |
| 12        | 0.317   | 224.470      | 80.652      | 15.88                                | 89.98                                            | 118.2                                            |
| 13        | 0.343   | 229.684      | 80.062      | 12.74                                | 89.92                                            | 116.5                                            |
| 14        | 0.393   | 229.123      | 81.243      | 13.81                                | 87.73                                            | 124.5                                            |
| 15        | 0.377   | 232.829      | 80.932      | 13.18                                | 88.04                                            | 125.0                                            |
| 16        | 0.397   | 228.396      | 81.183      | 14.43                                | 88.10                                            | 121.1                                            |
| 17        | 0.493   | 245.621      | 81.854      | 39.41                                | 82.14                                            | 124.6                                            |
| 18        | 0.482   | 245.458      | 81.895      | 38.15                                | 82.58                                            | 124.9                                            |
| 19        | 0.430   | 231.371      | 82.003      | 41.16                                | 82.71                                            | 125.4                                            |
| 20        | 0.505   | 247.806      | 78.889      | 32.19                                | 82.01                                            | 121.9                                            |
| 21        | 0.488   | 245.719      | 81.934      | 38.03                                | 83.27                                            | 122.5                                            |
| 22        | 0.372   | 206.864      | 82.349      | 40.29                                | 89.04                                            | 121.7                                            |
| 23        | 0.385   | 207.196      | 82.519      | 39.41                                | 89.29                                            | 121.9                                            |
| 24        | 0.366   | 191.872      | 82.389      | 47.30                                | 89.48                                            | 122.5                                            |



|    |       |         |        |       |       |       |
|----|-------|---------|--------|-------|-------|-------|
| 25 | 0.376 | 207.048 | 82.364 | 39.66 | 89.73 | 118.8 |
| 26 | 0.391 | 201.000 | 82.551 | 39.22 | 90.05 | 119.3 |
| 27 | 0.355 | 233.511 | 81.999 | 36.65 | 87.91 | 118.5 |
| 28 | 0.327 | 244.494 | 81.014 | 5.271 | 88.60 | 117.0 |
| 29 | 0.359 | 235.620 | 81.965 | 36.90 | 88.35 | 117.3 |
| 30 | 0.414 | 234.458 | 82.109 | 14.93 | 86.60 | 121.7 |
| 31 | 0.363 | 256.267 | 81.905 | 37.27 | 88.29 | 116.8 |
| 32 | 0.406 | 257.418 | 82.058 | 15.44 | 86.47 | 121.4 |
| 33 | 0.414 | 232.276 | 82.064 | 40.47 | 83.02 | 122.9 |
| 34 | 0.411 | 231.405 | 82.071 | 40.54 | 85.47 | 121.7 |
| 35 | 0.412 | 217.947 | 82.205 | 40.16 | 83.46 | 123.9 |
| 36 | 0.419 | 232.053 | 82.103 | 40.66 | 83.71 | 119.9 |
| 37 | 0.415 | 231.281 | 82.118 | 40.73 | 83.83 | 118.7 |
| 38 | 0.365 | 232.532 | 82.041 | 37.34 | 84.52 | 117.1 |
| 39 | 0.361 | 233.168 | 82.087 | 37.40 | 84.71 | 116.7 |
| 40 | 0.361 | 217.888 | 82.136 | 37.02 | 84.90 | 117.1 |
| 41 | 0.366 | 232.429 | 82.070 | 37.59 | 84.09 | 115.8 |
| 42 | 0.364 | 233.065 | 82.094 | 37.59 | 85.34 | 114.9 |
| 43 | 0.361 | 259.254 | 83.710 | 16.50 | 87.03 | 117.7 |
| 44 | 0.343 | 244.290 | 83.881 | 15.12 | 87.73 | 117.8 |
| 45 | 0.366 | 258.982 | 83.762 | 16.44 | 87.79 | 116.5 |
| 46 | 0.363 | 259.339 | 83.771 | 14.37 | 87.91 | 115.6 |

### Explanation of descriptors

Regarding the remaining descriptors, there are one topological descriptor (No.1) [1,2], and eight quantum-chemical descriptors (Nos.4, 5, 6, 7, 8, 10, 11 and 12) [2-5]. The topological descriptor (No.1) average Information content (order 2) is defined on the basis of the Shannon information theory and is calculated by the equation (S1):

$${}^k\overline{IC} = -\sum_i \frac{n_i}{n} \log_2 \frac{n_i}{n} \quad (S1)$$

where  $n_i$  is a number of atoms in the  $i^{\text{th}}$  class and  $n$  is a total number of atoms in the molecule.

As to the quantum-chemical descriptors, No.4 descriptor is the energy gap between the complex's LUMO and HOMO orbitals. No.5 and No. 6 descriptors are max electrophilic reactivity index for a C atom ( $E_A$ ) and max 1-electronic reactivity index for C atom, respectively. The former is a charge distribution related descriptor calculated by equation (S2):

$$E_A = \sum_{j \in A} C_{jLUMO}^2 / (\epsilon_{LUMO} + 10) \quad (S2)$$

where  $C_{jLUMO}$  is the  $j^{th}$  AO coefficients on the lowest unoccupied molecular orbital. And  $\epsilon_{LUMO}$  is the energy of the orbitals. Max 1-electronic reactivity index for C atom depends on the calculated charge distribution in the molecules, referring to the reactivity at the site of C atoms in the molecule. This descriptor is calculated by equation (S3):

$$R_A = \sum_{i \in A} \sum_{j \in A} C_{iHOMO} \cdot C_{jLUMO} / (\epsilon_{LUMO} - \epsilon_{HOMO}) \quad (S3)$$

where the  $C_{iHOMO}$  and  $C_{jLUMO}$  are the molecular frontier orbital coefficients, the  $\epsilon_{LUMO}$  and  $\epsilon_{HOMO}$  are the molecular orbital energy. These two descriptors express the relative reactivity of the atom which is also relevant with the energy of activation of the corresponding chemical reaction.

The quantum-chemical descriptors No.7 and No.8 are FNSA-2 Fractional PNSA(PNSA-2/TMSA) and WNSA-3 Weighted PNSA (PNSA3\*TMSA/1000) [Quantum-Chemical PC], respectively. Both the descriptors are classified as the CPSA (Charged Partial Surface Areas) descriptors. The descriptor FNSA-2 Fractional PNSA (PNSA-2/TMSA) is calculated by the equations (S6):

$$FNSA-2 = PNSA-2/TMSA = \frac{Q^- \sum_a^- SA_a^-}{TMSA} \quad (S4)$$

where  $SA_a^-$  is the surface area contributions of the  $a^{th}$  negative atoms,  $Q^-$  the total sum of partial negative charges in the molecule, and the sum is restricted to negatively charged atoms  $a^-$ . And TMSA is the total molecular solvent-accessible surface area. The descriptor WNSA-3 Weighted PNSA (PNSA3\*TMSA/1000) [Quantum-Chemical PC] is calculated by the equations (1) in the main text. Both descriptors roughly reflect the charge distribution of these negatively charged atoms.

The quantum-chemical descriptor max SIGMA-SIGMA bond order (No. 10) for a given pair of atomic species in the molecule relates to the strength of intra-molecular

bonding interactions and characterizes the stability of the molecules. The descriptors avg valency of a N atom (No. 11) and min valency of a H atom (No.12) are both quantum chemical descriptor describing the interaction of nitrogen atom's bonding and hydrogen-bonding, respectively.

## References

1. Olasupo, S.B.; Uzairu, A.; Shallangwa, G.; Uba, S. QSAR analysis and molecular docking simulation of norepinephrine transporter (NET) inhibitors as anti-psychotic therapeutic agents. *Heliyon*. **2019**, *5*, e02640.
2. Katritzky, A.R.; Lobanov, V.S; Karelson, M.; Murugan, R.; Grendze, M.P.; Toomey, J.E. Comprehensive descriptors for structural and statistical analysis. 1: correlations between structure and physical properties of substituted pyridines. *Rev. Roum. de Chim.* **1996**, *41*, 851-867.
3. Stanton, D.T.; Jurs, P.C. Development and use of charged partial surface area structural descriptors in computer-assisted quantitative structure-property relationship studies. *Anal. Chem.* **1990**, *62*, 2323-2329.
4. Charton, M. Advances in quantative structure-property relationships. *Elsevier*. **2002**, 126-128.
5. Todeschini, R.; Consonni, V. Handbook of molecular descriptors (Vol. 11). *John Wiley & Sons*. **2008**, 53-54.
